# Supplementary material
Source: Atypon-hosted journal article supplement (https://static.yanyin.tech/literature/current_protocol/10.1002/cpz1.1035/attachments/downloadSupplement)
Supplement: downloadSupplement [file downloadSupplement]

## Sheet: Actively Updated Masterlist
Species Name	Date Identified (year)	Natural Host(s)	Site of Infection	Spore Length Average (µm)	Spore Width Average (µm)	Spore Shape (Class; Condition)	Cultivation temperature	Locality	18S Accession #	References
Enteropsectra breve	2016	Oscheius tipulae	intestine (does not affect intestinal cells)	1.8	0.66	ovoid	21C	Orsay (Essonne); France	KX360145	Zhang G, Sachse M, Prevost M-C, Luallen RJ, Troemel ER, Félix M-A. A Large Collection of Novel Nematode-Infecting Microsporidia and Their Diverse Interactions with Caenorhabditis elegans and Other Related Nematodes. PLOS Pathogens. Public Library of Science; 2016;12:e1006093.
Enteropsectra longa	2016	Oscheius sp. 3	epidermis	3.8	0.49	long thin rod	21C	Iceland	KX360142	Zhang G, Sachse M, Prevost M-C, Luallen RJ, Troemel ER, Félix M-A. A Large Collection of Novel Nematode-Infecting Microsporidia and Their Diverse Interactions with Caenorhabditis elegans and Other Related Nematodes. PLOS Pathogens. Public Library of Science; 2016;12:e1006093.
Nematocida ausubeli	2016	Caenorhabditis briggsae; Caenorhabditis elegans; Caenorhabditis remanei	intestinal cells	2.80 (c1); 2.04 (c2)	0.96 (c1); 0.53 (c2)	ovoid	21C	(Kerala) India; Germany; Cape Verde; Europe	JH604648	Zhang G, Sachse M, Prevost M-C, Luallen RJ, Troemel ER, Félix M-A. A Large Collection of Novel Nematode-Infecting Microsporidia and Their Diverse Interactions with Caenorhabditis elegans and Other Related Nematodes. PLOS Pathogens. Public Library of Science; 2016;12:e1006093.
Nematocida ciargi	2016	Procephalobus sp. strain JU2895	intestinal cells	1.4	0.59	ovoid	21C	(Barcelona) Spain	KX360152	Zhang G, Sachse M, Prevost M-C, Luallen RJ, Troemel ER, Félix M-A. A Large Collection of Novel Nematode-Infecting Microsporidia and Their Diverse Interactions with Caenorhabditis elegans and Other Related Nematodes. PLOS Pathogens. Public Library of Science; 2016;12:e1006093.
Nematocida displodere	2016	Caenorhabditis elegans	epidermis; muscle; neurons; intestine; coelomocytes; and seam cells	2.38	1.03	oblong	15C	(Santeuil, Val-d’Oise, Île-de-France) France		Luallen RJ, Reinke AW, Tong L, Botts MR, Félix M-A, Troemel ER. Discovery of a Natural Microsporidian Pathogen with a Broad Tissue Tropism in Caenorhabditis elegans. PLOS Pathogens. Public Library of Science; 2016;12:e1005724.
Nematocida homosporus	2016	Oscheius tipulae; Rhabditella typhae	intestinal cells	2	0.72	ovoid	21C	(Le Blanc (Indre)) France; Portugal	KX360153	Zhang G, Sachse M, Prevost M-C, Luallen RJ, Troemel ER, Félix M-A. A Large Collection of Novel Nematode-Infecting Microsporidia and Their Diverse Interactions with Caenorhabditis elegans and Other Related Nematodes. PLOS Pathogens. Public Library of Science; 2016;12:e1006093.
Nematocida major	2016	Caenorhabditis briggsae; Caenorhabditis tropicali	intestinal cells	3.4 (c1); 2.3 (c2)	1.2 (c1); 0.54 (c2)	ovoid	21C	Thailand; Guadeloupe	KX360148	Zhang G, Sachse M, Prevost M-C, Luallen RJ, Troemel ER, Félix M-A. A Large Collection of Novel Nematode-Infecting Microsporidia and Their Diverse Interactions with Caenorhabditis elegans and Other Related Nematodes. PLOS Pathogens. Public Library of Science; 2016;12:e1006093.
Nematocida minor	2016	Oscheius tipulae	Intestinal cells	1.9 (c1); 1.3 (c2)	0.83 (c1); 0.55 (c2)	ovoid	21C	Czech Republic; Armenia	KX360147	Zhang G, Sachse M, Prevost M-C, Luallen RJ, Troemel ER, Félix M-A. A Large Collection of Novel Nematode-Infecting Microsporidia and Their Diverse Interactions with Caenorhabditis elegans and Other Related Nematodes. PLOS Pathogens. Public Library of Science; 2016;12:e1006093.
Nematocida parisii	2016	Caenorhabditis elegans; Caenorhabditis briggsae	Intestine	2.18 (c1); 3.17 (c2)	0.8 (c1); 1.31 (c2)	Rod-shaped	21C	France		Zhang, G., Sachse, M., Prevost, M.-C., Luallen, R.J., Troemel, E.R., Felix, M.-A., 2016. A Large Collection of Novel Nematode-Infecting Microsporidia and Their Diverse Interactions with Caenorhabditis elegans and Other Related Nematodes. PLoS Pathog 12, e1006093. https://doi.org/10.1371/journal.ppat.1006093 Troemel, E.R., Felix, M.-A., Whiteman, N.K., Barriere, A., Ausubel, F.M., 2008. Microspori…
Pancytospora epiphaga	2016	Caenorhabditis brenneri	epidermis	3.71	0.8	ovoid	21C	(Medellin) Colombia	KX424959	Zhang G, Sachse M, Prevost M-C, Luallen RJ, Troemel ER, Félix M-A. A Large Collection of Novel Nematode-Infecting Microsporidia and Their Diverse Interactions with Caenorhabditis elegans and Other Related Nematodes. PLOS Pathogens. Public Library of Science; 2016;12:e1006093.
Pancytospora philotis	2016	Oscheius tipula	intestinal cells	3.5	0.42	long thin rod	21C	(Le Blanc (Indre)) France	KX360131	Zhang G, Sachse M, Prevost M-C, Luallen RJ, Troemel ER, Félix M-A. A Large Collection of Novel Nematode-Infecting Microsporidia and Their Diverse Interactions with Caenorhabditis elegans and Other Related Nematodes. PLOS Pathogens. Public Library of Science; 2016;12:e1006093.
Percutemincola moriokae	2018	Oscheius tipulae	Hypodermis; then intestine	3.75 (intestine, ); 3.75 (hypodermis, )	1 (intestine); 1.5 (hypodermis)	rod-shaped	21C	(Morioka, Iwate Prefecture) Japan	IMUm001	Nishikori K, Setiamarga DHE, Tanji T, Kuroda E, Shiraishi H, Ohashi-Kobayashi A. A new microsporidium Percutemincola moriokae gen. nov., sp. nov. from Oscheius tipulae: A novel model of microsporidia–nematode associations. Parasitology. Cambridge University Press; 2018;145:1853–64.
Nematocida ferruginous	2023	Caenorhabditis elegans	muscle and epidermis	1.72	0.6	ovoid	21C	France		Wadi L, Tamim El Jarkass H, Tran TD, Islah N, Luallen RJ, Reinke AW#. Genomic and phenotypic evolution of nematode-infecting microsporidia. Plos Pathogens (In press)
Nematocida cider	2023	Caenorhabditis sp. 8	intestine, muscle, and epidermis	2.4	0.67	ovoid	21C	United States		Wadi L, Tamim El Jarkass H, Tran TD, Islah N, Luallen RJ, Reinke AW#. Genomic and phenotypic evolution of nematode-infecting microsporidia. Plos Pathogens (In press)
Nematocida botruosus	2023	Panagrellus sp. 2	intestine	1.51	0.76	ovoid	21C	Canada		Wadi L, Tamim El Jarkass H, Tran TD, Islah N, Luallen RJ, Reinke AW#. Genomic and phenotypic evolution of nematode-infecting microsporidia. Plos Pathogens (In press)
